# Supplementary material for: Upregulation of IGF2 is associated with an acquired resistance for cis-diamminedichloroplatinum in human head and neck squamous cell carcinoma
Source: Springer Nature journal article supplement (doi:10.1007/s00405-010-1257-4), 2010-05-04
Supplement: MOESM4 [file 405_2010_1257_MOESM4_ESM.xls]

## Sheet: Supplementary Table S1
Supplementary Table S1. Nucleotide sequences of primers and probes for qRT-PCR
Accession number	Description	Forward primer	Reverse primer	Probe
NM_000612	IGF2	GTGGAGCATTCAGACTTGTC	CAAACATGGAGACAGCACTC	TCACCTTCTTGGCCTTCGCCTCGT
Hs.103886	NCOA3	AGAGCCGACAGGCACTGAATT	CACCCTCTGTTGTCGGAAGTGA	AAAATGGAAAACCCTACTGCTGGTGGTGC
NM_004048	B2M*	CCTGATATAGCTTGACACCAAG	GAGAAGCAGTAGGTAAGAAGTG	CTGAAAAAGATGAGTATGCCTGCCGTGTG
*Nucleotide sequences were reported by Ogawa et al. [14].
